# Supplementary material for: Association of Prehospital Plasma With Survival in Patients With Traumatic Brain Injury: A Secondary Analysis of the PAMPer Cluster Randomized Clinical Trial
Source: PubMed Central journal article supplement (PMC7563075; doi:10.1001/jamanetworkopen.2020.16869), 2020-10-15
Supplement: jamanetwopen-e2016869-s003.pdf [file jamanetwopen-e2016869-s003.pdf]

## Data Sharing Statement

Gruen. Association of Prehospital Plasma With Survival in Patients With Traumatic Brain Injury. *JAMA Netw Open*. Published October 15, 2020. 10.1001/jamanetworkopen.2020.16869

### Data

**Data available:** No

### Additional Information

**Explanation for why data not available:** The full study protocol, statistical analysis plan, and supplementary material for the primary trial is publicly available

(<https://clinicaltrials.gov/ct2/show/NCT01818427>). The analysis code for this study is available on GitHub (<https://github.com/dgru/pamper-tbi>). Individual participant data is not available.
